# Supplementary material for: Maternal Work–Life Balance and Children’s Social Adjustment: The Mediating Role of Perceived Stress and Parenting Practices
Source: MDPI journal article supplement (doi:10.3390/ijerph18136924), 2021-06-28
Supplement: s1 [file s1]

**Table S1.** Descriptive statistics for the study variables

| <i>Description</i>                                                   | <i>Range</i> | <i>M</i> | <i>SD</i> | <i><math>\alpha</math></i> |
|----------------------------------------------------------------------|--------------|----------|-----------|----------------------------|
| Work–Life Balance: Survey Work–Home Interaction–NijmeGen (SWING)     |              |          |           |                            |
| Work–family negative spillover                                       | 0–24         | 4.96     | 4.26      | 0.87                       |
| Work–family positive spillover                                       | 0–15         | 6.96     | 3.62      | 0.86                       |
| Perceived Stress: Perceived Stress Scale (PSS)                       |              |          |           |                            |
| Perceived stress                                                     | 0–40         | 18.72    | 6.06      | 0.82                       |
| Parenting Practices: Alabama Parenting Questionnaire (APQ)           |              |          |           |                            |
| Poor monitoring/supervision                                          | 10–50        | 16.22    | 4.67      | 0.82                       |
| Inconsistent discipline                                              | 6–30         | 12.16    | 3.19      | 0.74                       |
| Corporal punishment                                                  | 3–15         | 5.68     | 2.04      | 0.69                       |
| Positive parenting                                                   | 6–30         | 22.51    | 3.82      | 0.81                       |
| Involvement                                                          | 10–50        | 37.89    | 5.31      | 0.82                       |
| Children’s Behaviors: Strengths and Difficulties Questionnaire (SDQ) |              |          |           |                            |
| Externalizing problems                                               | 0–20         | 4.62     | 3.13      | 0.76                       |
| Internalizing problems                                               | 0–20         | 3.29     | 2.80      | 0.68                       |
| Prosocial behaviors                                                  | 0–10         | 6.68     | 2.11      | 0.71                       |

**Table S2.** Correlations between maternal work–life balance, perceived stress, parenting practices, and children’s behaviors

| <i>Variable</i>                   | <i>1</i> | <i>2</i>  | <i>3</i>  | <i>4</i>  | <i>5</i>  | <i>6</i>  | <i>7</i> | <i>8</i> |
|-----------------------------------|----------|-----------|-----------|-----------|-----------|-----------|----------|----------|
| Maternal Work–Life Balance        |          |           |           |           |           |           |          |          |
| 1. Work–family negative spillover | —        |           |           |           |           |           |          |          |
| 2. Work–family positive spillover | -0.013   | —         |           |           |           |           |          |          |
| Mothers’ Perceived Stress         |          |           |           |           |           |           |          |          |
| 3. Perceived stress               | 0.405*** | -0.211*** | —         |           |           |           |          |          |
| Mothers’ Parenting Practices      |          |           |           |           |           |           |          |          |
| 4. Negative parenting practices   | 0.271*** | -0.171**  | 0.246***  | —         |           |           |          |          |
| 5. Positive parenting practices   | -0.119*  | 0.351***  | -0.245*** | -0.344*** | —         |           |          |          |
| Children’s Behaviors              |          |           |           |           |           |           |          |          |
| 6. Externalizing problems         | 0.136**  | -0.160**  | 0.255***  | 0.340***  | -0.225*** | —         |          |          |
| 7. Internalizing problems         | 0.163**  | -0.164**  | 0.292***  | 0.195***  | -0.194*** | 0.401***  | —        |          |
| 8. Prosocial behaviors            | -0.044   | 0.294***  | -0.061    | -0.213*** | 0.331***  | -0.290*** | -0.137** | —        |

**Table S3.** Path analyses

| <i>Construct</i>                    |   |                              | <i>B</i> | <i>SE</i> | $\beta$ | <i>p</i> |
|-------------------------------------|---|------------------------------|----------|-----------|---------|----------|
| <b>Maternal Work–Life Balance</b>   |   |                              |          |           |         |          |
| Work–family negative spillover      | → | Perceived stress             | 0.405    | 0.042     | 9.598   | <0.001   |
| Work–family negative spillover      | → | Negative parenting practices | 0.240    | 0.056     | 4.260   | <0.001   |
| Work–family negative spillover      | → | Positive parenting practices | -0.050   | 0.048     | -1.039  | 0.299    |
| Work–family negative spillover      | → | Externalizing problems       | -0.036   | 0.049     | -0.739  | 0.460    |
| Work–family negative spillover      | → | Internalizing problems       | 0.032    | 0.047     | 0.677   | 0.498    |
| Work–family negative spillover      | → | Prosocial behaviors          | 0.009    | 0.048     | 0.195   | 0.845    |
| Work–family positive spillover      | → | Perceived stress             | -0.217   | 0.044     | -4.981  | <0.001   |
| Work–family positive spillover      | → | Negative parenting practices | -0.160   | 0.054     | -2.950  | 0.003    |
| Work–family positive spillover      | → | Positive parenting practices | 0.325    | 0.046     | 7.034   | <0.001   |
| Work–family positive spillover      | → | Externalizing problems       | -0.059   | 0.048     | -1.223  | 0.221    |
| Work–family positive spillover      | → | Internalizing problems       | -0.067   | 0.047     | -1.432  | 0.152    |
| Work–family positive spillover      | → | Prosocial behaviors          | 0.215    | 0.047     | 4.590   | <0.001   |
| <b>Mothers' Perceived Stress</b>    |   |                              |          |           |         |          |
| Perceived stress                    | → | Negative parenting practices | 0.161    | 0.058     | 2.782   | 0.005    |
| Perceived stress                    | → | Positive parenting practices | -0.161   | 0.049     | -3.285  | 0.001    |
| Perceived stress                    | → | Externalizing problems       | 0.137    | 0.049     | 2.763   | 0.006    |
| Perceived stress                    | → | Internalizing problems       | 0.205    | 0.048     | 4.310   | <0.001   |
| Perceived stress                    | → | Prosocial behaviors          | 0.070    | 0.048     | 1.463   | 0.144    |
| <b>Mothers' Parenting Practices</b> |   |                              |          |           |         |          |
| Negative parenting practices        | → | Externalizing problems       | 0.298    | 0.054     | 5.514   | <0.001   |
| Negative parenting practices        | → | Internalizing problems       | 0.094    | 0.053     | 1.754   | 0.049    |
| Negative parenting practices        | → | Prosocial behaviors          | -0.102   | 0.054     | -1.903  | 0.047    |
| Positive parenting practices        | → | Externalizing problems       | -0.062   | 0.050     | -1.243  | 0.214    |
| Positive parenting practices        | → | Internalizing problems       | -0.065   | 0.048     | -1.345  | 0.178    |
| Positive parenting practices        | → | Prosocial behaviors          | 0.221    | 0.048     | 4.579   | <0.001   |

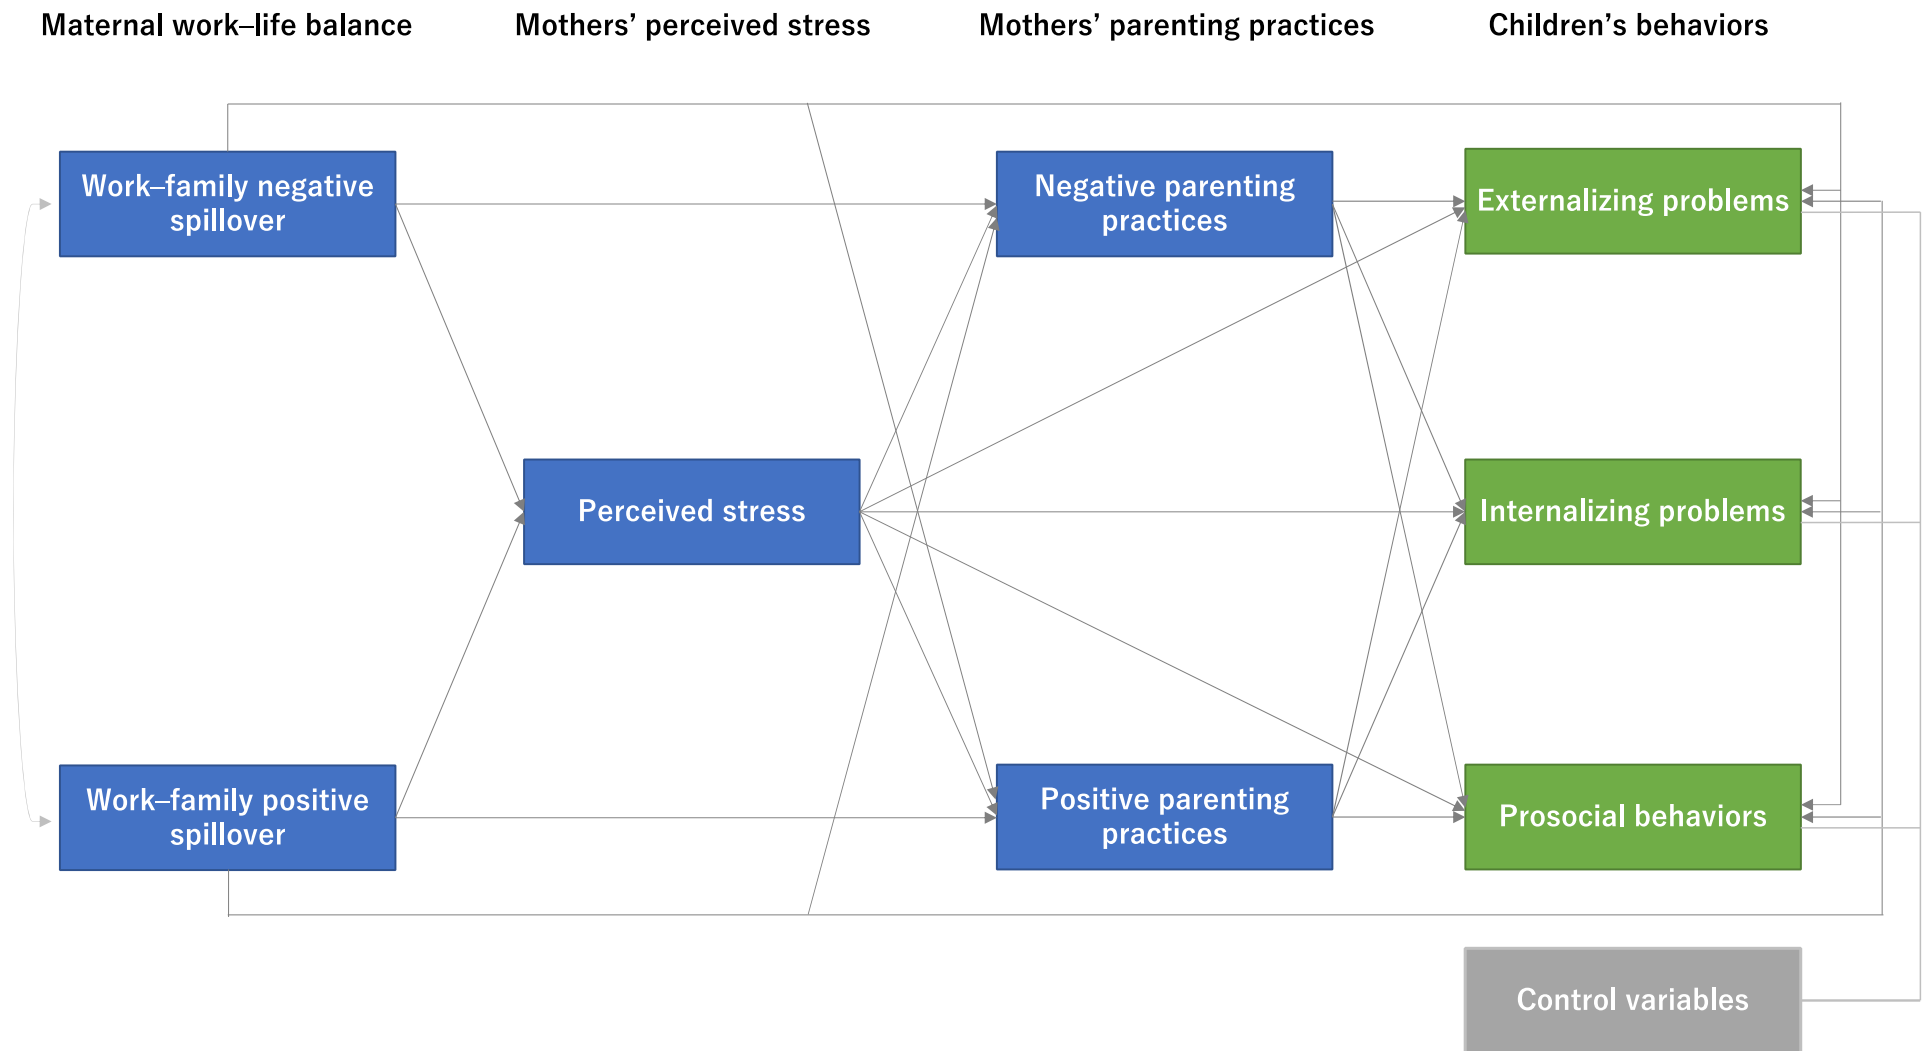

**Figure S1.** Path of maternal work-life balance, perceived stress, parenting practices, and children's behaviors

*Note:* This model includes the hypothesized pathways between maternal work-life balance, perceived stress, parenting practices, and children's behaviors.
